# Supplementary material for: Biologic subtypes of melanoma predict survival benefit of combination anti-PD1+anti-CTLA4 immune checkpoint inhibitors versus anti-PD1 monotherapy
Source: PubMed Central journal article supplement — J Immunother Cancer. 2021 Jan 22;9(1):e001642. doi: 10.1136/jitc-2020-001642 (PMC7831745; doi:10.1136/jitc-2020-001642), 2021-01-22
Supplement: jitc-2020-001642supp001.pdf [file jitc-2020-001642supp001.pdf]

**Supplemental Figure Legends:****Figure S1: Association between anti-PD1 regimen and survival in melanoma**

(A) cPFS and (B) OS for the entire cohort of melanoma patients; anti-PD1 (n=172) anti-PD1+ anti-CTLA4 (n=77), Log-rank test P=0.0098 (cPFS); P=0.0132 (OS). Blue line = anti-PD1 monotherapy and Green line = anti-PD1+anti-CTLA4. Tick marks indicate censored patients.

**Figure S2: Survival of BRAF/NRAS wild-type melanoma patients according to anti-PD1 regimen and primary tumor type.**

(A) cPFS and (B) OS for patients with BRAF/NRAS wild-type non-mucosal melanoma; anti-PD1 (n=58) anti-PD1+ anti-CTLA4 (n=15), Log-rank test P=0.9821 (cPFS); P= 0.4338 (OS). (C) cPFS and (D) OS for patients with BRAF/NRAS wild-type mucosal melanoma; anti-PD1 (n=11) anti-PD1+ anti-CTLA4 (n=10), Log-rank test P=0.0007 (cPFS); P= 0.0034 (OS). Tick marks indicate censored patients. Blue line = Anti-PD1 monotherapy and Green line = anti-PD1+anti-CTLA4.

**Figure S3: Survival of BRAF/NRAS wild-type melanoma patients according to the presence or absence of a KIT mutation.**

(A) cPFS and (B) OS for patients with KIT mutant (n=8) or BRAF/NRAS/KIT wildtype (n=71), Log-rank test P=0.8243 (cPFS); P= 0.7868 (OS). The KIT mutant population comprised 7 patients, including: cutaneous melanoma (n=4), mucosal melanoma (n=2) and acral melanoma (n=1). The patient with acral melanoma received 2 lines of anti-PD1 ICI, first ipilimumab + nivolumab which was

discontinued due to toxicity. Then, upon progression they were treated with pembrolizumab, which was discontinued due to progression; both lines of treatment are included in these analyses. Both patients with *KIT* mutant mucosal melanoma received anti-PD1 + anti-CTLA4 ICI. All four patients with *KIT* mutant cutaneous melanoma received anti-PD1 monotherapy. One patient with cutaneous *KIT* mutant melanoma also had a concomitant *NRAS* mutation. Tick marks indicate censored patients. Blue line = *BRAF/NRAS/KIT* wild-type (n=73) and Green line = *KIT* mutant (n=8).

**Table S1: Characteristics in the entire melanoma cohort and according to anti-PD1 treatment regimen**

|                    |                                | Entire cohort (n=249) | Anti-PD1 monotherapy (n=172) | Anti-PD1 + anti-CTLA4 (n=77) | P-value          |
|--------------------|--------------------------------|-----------------------|------------------------------|------------------------------|------------------|
| Genomic subtype    |                                |                       |                              |                              | 0.472            |
|                    | <b>BRAF V600E/K</b>            | 86 (35%)              | 56 (33%)                     | 30 (39%)                     |                  |
|                    | <b>NRAS</b>                    | 69 (28%)              | 47 (27%)                     | 22 (29%)                     |                  |
|                    | <b>BRAF/NRAS wt</b>            | 94 (38%)              | 69 (40%)                     | 25 (32%)                     |                  |
| Primary tumor type |                                |                       |                              |                              | <b>0.022</b>     |
|                    | <b>Cutaneous</b>               | 183 (73%)             | 136 (79%)                    | 47 (61%)                     |                  |
|                    | <b>Unknown</b>                 | 20 (8%)               | 10 (6%)                      | 10 (14%)                     |                  |
|                    | <b>Primary</b>                 |                       |                              |                              |                  |
|                    | <b>Mucosal</b>                 | 28 (11%)              | 15 (9%)                      | 13 (17%)                     |                  |
| Age                | <b>Acral</b>                   | 18 (7%)               | 11 (6%)                      | 7 (9%)                       |                  |
|                    |                                |                       |                              |                              | <b>0.006</b>     |
|                    | <b>&lt;60</b>                  | 122 (49%)             | 74 (43%)                     | 48 (62%)                     |                  |
|                    |                                |                       |                              |                              |                  |
|                    | <b>≥60</b>                     | 127 (51%)             | 98 (57%)                     | 29 (38%)                     |                  |
| Gender             |                                |                       |                              |                              | <b>0.035</b>     |
|                    | <b>male</b>                    | 145 (58%)             | 96 (56%)                     | 53 (69%)                     |                  |
|                    | <b>female</b>                  | 104 (42%)             | 76 (44%)                     | 24 (31%)                     |                  |
| # metastatic sites |                                |                       |                              |                              | 0.144            |
|                    | <b>&gt;3</b>                   | 184 (74%)             | 131 (76%)                    | 53 (69%)                     |                  |
|                    | <b>≤3</b>                      | 65 (26%)              | 41 (24%)                     | 24 (31%)                     |                  |
| M-stage            |                                |                       |                              |                              | 0.066            |
|                    | <b>M0/M1a/M1b</b>              | 93 (37%)              | 71 (41%)                     | 22 (44%)                     |                  |
|                    | <b>M1c/M1d</b>                 | 156 (63%)             | 101 (59%)                    | 55 (56%)                     |                  |
| LDH                |                                |                       |                              |                              | 0.876            |
|                    | <b>&lt;1.5x ULN</b>            | 183 (74%)             | 127 (74%)                    | 56 (73%)                     |                  |
|                    | <b>≥1.5x ULN</b>               | 65 (26%)              | 44 (26%)                     | 21 (27%)                     |                  |
| NLR                |                                |                       |                              |                              | 0.749            |
|                    | <b>&lt;5</b>                   | 188 (76%)             | 131 (76%)                    | 57 (74%)                     |                  |
|                    | <b>≥5</b>                      | 60 (24%)              | 40 (24%)                     | 20 (26%)                     |                  |
| Line of therapy    |                                |                       |                              |                              | <b>&lt;0.001</b> |
|                    | <b>1<sup>st</sup></b>          | 135 (54%)             | 72 (58%)                     | 63 (82%)                     |                  |
|                    | <b>2<sup>nd</sup> or later</b> | 114 (46%)             | 100 (42%)                    | 14 (18%)                     |                  |

**Table S2: Cox regression analyses for cutaneous melanoma patients (n=183)**

|                                                                        | cPFS - univariable |           |         | cPFS - multivariable |           |         | OS - univariable |           |         | OS - multivariable |           |         |
|------------------------------------------------------------------------|--------------------|-----------|---------|----------------------|-----------|---------|------------------|-----------|---------|--------------------|-----------|---------|
|                                                                        | HR                 | 95% CI    | P-value | HR                   | 95% CI    | P-value | HR               | 95% CI    | P-value | HR                 | 95% CI    | P-value |
| <b>Anti-PD1 regimen</b><br>PD1+CTLA4 vs. PD1                           | 0.75               | 0.48-1.15 | 0.190   | 0.66                 | 0.42-1.02 | 0.063   | 0.68             | 0.41-1.14 | 0.142   | 0.57               | 0.33-0.96 | 0.035   |
| <b>Genomic subtype</b><br>BRAF or NRAS mt vs. WT                       | 1.70               | 1.13-2.56 | 0.011   | 1.64                 | 1.07-2.49 | 0.022   | 1.50             | 0.96-2.36 | 0.077   | 1.65               | 1.02-2.67 | 0.043   |
| <b>Line of therapy</b><br>1 <sup>st</sup> vs. 2 <sup>nd</sup> or later | 0.65               | 0.46-0.93 | 0.019   | -                    | -         | -       | 0.62             | 0.41-0.92 | 0.019   | -                  | -         | -       |
| <b># metastatic sites</b><br>> 3 vs. ≤ 3                               | 2.50               | 1.72-3.65 | <0.001  | 2.25                 | 1.53-3.31 | <0.001  | 2.60             | 1.72-3.95 | <0.001  | 2.24               | 1.46-3.44 | <0.001  |
| <b>M-stage</b><br>M1c/1d vs. M0/1a/1b                                  | 1.50               | 1.04-2.17 | 0.028   | -                    | -         | -       | 1.86             | 1.23-2.82 | 0.003   | -                  | -         | -       |
| <b>LDH</b><br>≥1.5X ULN vs. < 1.5x                                     | 1.90               | 1.25-2.89 | 0.003   | 1.57                 | 1.03-2.41 | 0.037   | 2.42             | 1.53-3.84 | <0.001  | 1.88               | 1.16-3.03 | 0.010   |
| <b>NLR</b><br>≥5 vs. <5                                                | 1.47               | 0.98-2.21 | 0.060   | -                    | -         | -       | 1.82             | 1.18-2.82 | 0.007   | 1.58               | 0.99-2.53 | 0.056   |
| <b>Age</b><br>≥60 vs. <60                                              | 0.84               | 0.59-1.20 | 0.329   | -                    | -         | -       | 1.38             | 0.92-2.07 | 0.119   | -                  | -         | -       |
| <b>Gender</b><br>male vs. female                                       | 0.93               | 0.65-1.33 | 0.685   | -                    | -         | -       | 0.96             | 0.64-1.43 | 0.824   | -                  | -         | -       |

**Table S3: Cox regression analysis for NRAS mutant melanoma patients (n=69)**

|                                                                        | cPFS - univariable |           |         | cPFS - multivariable |           |         | OS - univariable |           |         | OS - multivariable |           |         |
|------------------------------------------------------------------------|--------------------|-----------|---------|----------------------|-----------|---------|------------------|-----------|---------|--------------------|-----------|---------|
|                                                                        | HR                 | 95% CI    | P-value | HR                   | 95% CI    | P-value | HR               | 95% CI    | P-value | HR                 | 95% CI    | P-value |
| <b>Anti-PD1 regimen</b><br>PD1+CTLA4 vs. PD1                           | 0.45               | 0.23-0.92 | 0.029   | 0.34                 | 0.16-0.71 | 0.004   | 0.49             | 0.21-1.13 | 0.095   | 0.24               | 0.10-0.62 | 0.003   |
| <b>Primary tumor type</b><br>acral or mucosal vs.<br>cutaneous or UP   | 1.55               | 0.77-3.15 | 0.222   | -                    | -         | -       | 2.01             | 0.93-4.35 | 0.076   | 3.18               | 1.34-7.51 | 0.008   |
| <b>Line of therapy</b><br>1 <sup>st</sup> vs. 2 <sup>nd</sup> or later | 0.82               | 0.45-1.51 | 0.525   | -                    | -         | -       | 0.65             | 0.33-1.27 | 0.204   | -                  | -         | -       |
| <b># metastatic sites</b><br>> 3 vs. ≤ 3                               | 1.64               | 0.88-3.09 | 0.121   | 2.27                 | 1.17-4.42 | 0.016   | 1.69             | 0.83-3.46 | 0.152   | 3.14               | 1.38-7.16 | 0.006   |
| <b>M-stage</b><br>M1c/1d vs. M0/1a/1b                                  | 1.96               | 1.04-3.70 | 0.037   | -                    | -         | -       | 2.57             | 1.20-5.53 | 0.015   | -                  | -         | -       |
| <b>LDH</b><br>≥1.5X ULN vs. < 1.5x                                     | 2.32               | 1.28-4.21 | 0.005   | 2.80                 | 1.52-5.18 | 0.001   | 3.23             | 1.64-6.37 | 0.001   | 4.25               | 2.05-8.78 | <0.001  |
| <b>NLR</b><br>≥5 vs. <5                                                | 1.59               | 0.82-3.08 | 0.165   | -                    | -         | -       | 2.30             | 1.12-4.74 | 0.024   | -                  | -         | -       |
| <b>Age</b><br>≥60 vs. <60                                              | 1.29               | 0.69-2.42 | 0.429   | -                    | -         | -       | 1.74             | 0.81-3.74 | 0.152   | 2.50               | 1.13-5.52 | 0.024   |
| <b>Gender</b><br>male vs. female                                       | 0.86               | 0.48-1.54 | 0.617   | -                    | -         | -       | 1.05             | 0.55-2.02 | 0.881   | -                  | -         | -       |

**Table S4: Cox regression analysis for BRAF V600E/K mutant advanced melanoma patients (n=86)**

|                                                                        | cPFS - univariable |           |         | cPFS - multivariable |           |         | OS - univariable |           |         | OS - multivariable |           |         |
|------------------------------------------------------------------------|--------------------|-----------|---------|----------------------|-----------|---------|------------------|-----------|---------|--------------------|-----------|---------|
|                                                                        | HR                 | 95% CI    | P-value | HR                   | 95% CI    | P-value | HR               | 95% CI    | P-value | HR                 | 95% CI    | P-value |
| <b>Anti-PD1 regimen</b><br>PD1+CTLA4 vs. PD1                           | 0.64               | 0.37-1.09 | 0.100   | -                    | -         | -       | 0.49             | 0.25-0.94 | 0.033   | 0.47               | 0.24-0.90 | 0.024   |
| <b>Primary tumor type</b><br>acral or mucosal vs.<br>cutaneous or UP   | 1.17               | 0.29-4.82 | 0.824   | -                    | -         | -       | 1.17             | 0.28-4.85 | 0.824   | -                  | -         | -       |
| <b>Line of therapy</b><br>1 <sup>st</sup> vs. 2 <sup>nd</sup> or later | 0.61               | 0.36-1.04 | 0.070   | -                    | -         | -       | 0.45             | 0.24-0.87 | 0.017   | -                  | -         | -       |
| <b># metastatic sites</b><br>> 3 vs. ≤ 3                               | 3.14               | 1.89-5.25 | <0.001  | 3.48                 | 2.04-5.90 | <0.001  | 2.70             | 1.53-4.78 | 0.001   | 3.24               | 1.79-5.90 | <0.001  |
| <b>M-stage</b><br>M1c/1d vs. M0/1a/1b                                  | 1.92               | 1.11-3.12 | 0.019   | -                    | -         | -       | 2.08             | 1.11-3.89 | 0.021   | -                  | -         | -       |
| <b>LDH</b><br>≥1.5X ULN vs. < 1.5x                                     | 1.45               | 0.85-2.48 | 0.175   | -                    | -         | -       | 1.89             | 1.03-3.45 | 0.039   | -                  | -         | -       |
| <b>NLR</b><br>≥5 vs. <5                                                | 1.50               | 0.83-2.72 | 0.177   | 1.88                 | 1.02-3.46 | 0.041   | 1.81             | 0.94-3.50 | 0.075   | 2.54               | 1.28-5.05 | 0.008   |
| <b>Age</b><br>≥60 vs. <60                                              | 0.70               | 0.40-1.22 | 0.213   | -                    | -         | -       | 1.39             | 0.77-2.51 | 0.281   | -                  | -         | -       |
| <b>Gender</b><br>male vs. female                                       | 0.63               | 0.38-1.02 | 0.064   | -                    | -         | -       | 0.59             | 0.34-1.04 | 0.070   | -                  | -         | -       |

**Table S5: Cox regression analysis for BRAF/NRAS wild-type melanoma patients (n=94)**

|                                                                        | cPFS - univariable |           |         | cPFS - multivariable |           |         | OS - univariable |           |         | OS - multivariable |           |         |
|------------------------------------------------------------------------|--------------------|-----------|---------|----------------------|-----------|---------|------------------|-----------|---------|--------------------|-----------|---------|
|                                                                        | HR                 | 95% CI    | P-value | HR                   | 95% CI    | P-value | HR               | 95% CI    | P-value | HR                 | 95% CI    | P-value |
| <b>Anti-PD1 regimen</b><br>PD1+CTLA4 vs. PD1                           | 0.73               | 0.40-1.36 | 0.326   | -                    | -         | -       | 0.80             | 0.40-1.62 | 0.540   | -                  | -         | -       |
| <b>Primary tumor type</b><br>acral or mucosal vs.<br>cutaneous or UP   | 2.21               | 1.31-3.76 | 0.003   | 2.29                 | 1.35-3.91 | 0.002   | 2.24             | 1.25-4.00 | 0.007   | 2.29               | 1.28-4.11 | 0.005   |
| <b>Line of therapy</b><br>1 <sup>st</sup> vs. 2 <sup>nd</sup> or later | 0.43               | 0.25-0.72 | 0.001   | 0.42                 | 0.25-0.70 | 0.001   | 0.51             | 0.29-0.90 | 0.019   | 0.50               | 0.28-0.88 | 0.016   |
| <b># metastatic sites</b><br>> 3 vs. ≤ 3                               | 1.72               | 0.96-3.11 | 0.070   | -                    | -         | -       | 1.96             | 1.05-3.65 | 0.035   | -                  | -         | -       |
| <b>M-stage</b><br>M1c/1d vs. M0/1a/1b                                  | 0.90               | 0.54-1.52 | 0.710   | -                    | -         | -       | 1.17             | 0.66-2.08 | 0.583   | -                  | -         | -       |
| <b>LDH</b><br>≥1.5X ULN vs. < 1.5x                                     | 1.79               | 0.99-3.24 | 0.051   | -                    | -         | -       | 2.34             | 1.25-4.38 | 0.008   | -                  | -         | -       |
| <b>NLR</b><br>≥5 vs. <5                                                | 1.31               | 0.75-2.29 | 0.340   | -                    | -         | -       | 1.55             | 0.85-2.83 | 0.151   | -                  | -         | -       |
| <b>Age</b><br>≥60 vs. <60                                              | 0.81               | 0.49-1.37 | 0.443   | -                    | -         | -       | 1.02             | 0.58-1.82 | 0.922   | -                  | -         | -       |
| <b>Gender</b><br>male vs. female                                       | 0.86               | 0.51-1.45 | 0.578   | -                    | -         | -       | 0.94             | 0.53-1.68 | 0.839   | -                  | -         | -       |

**A**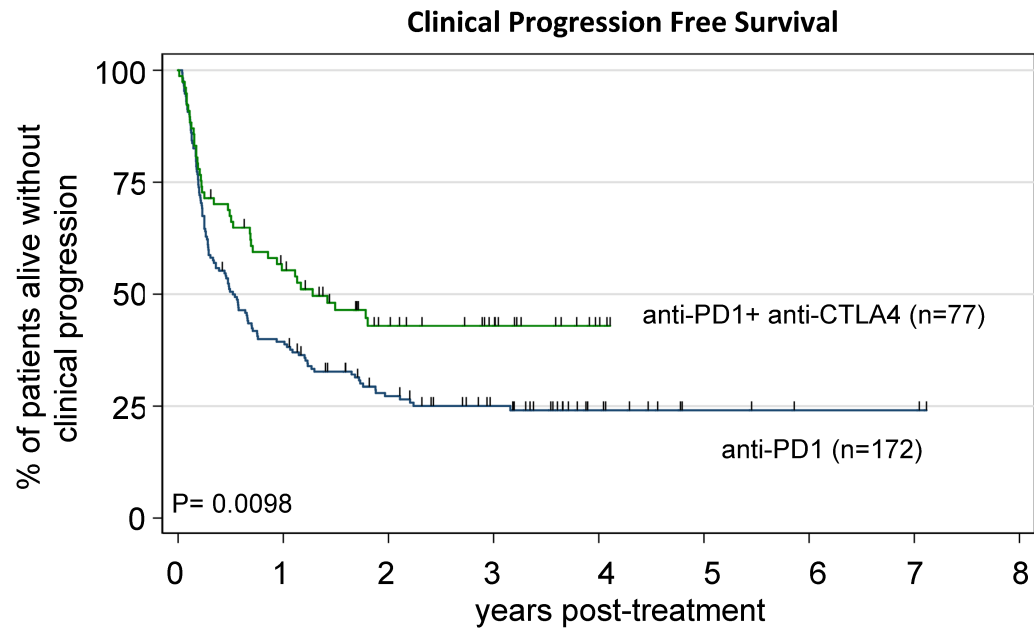**B**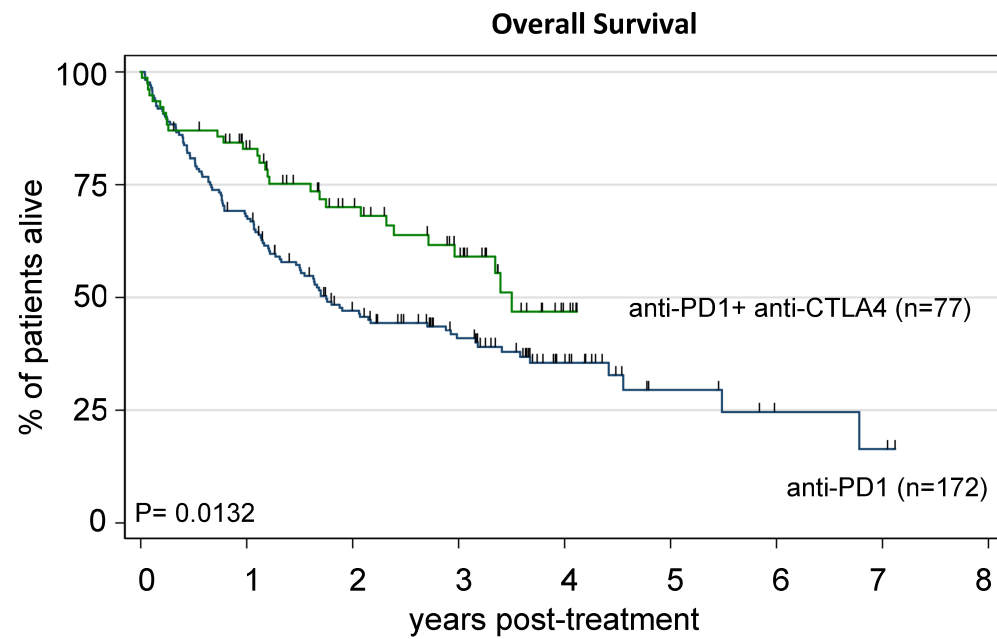

Figure S1



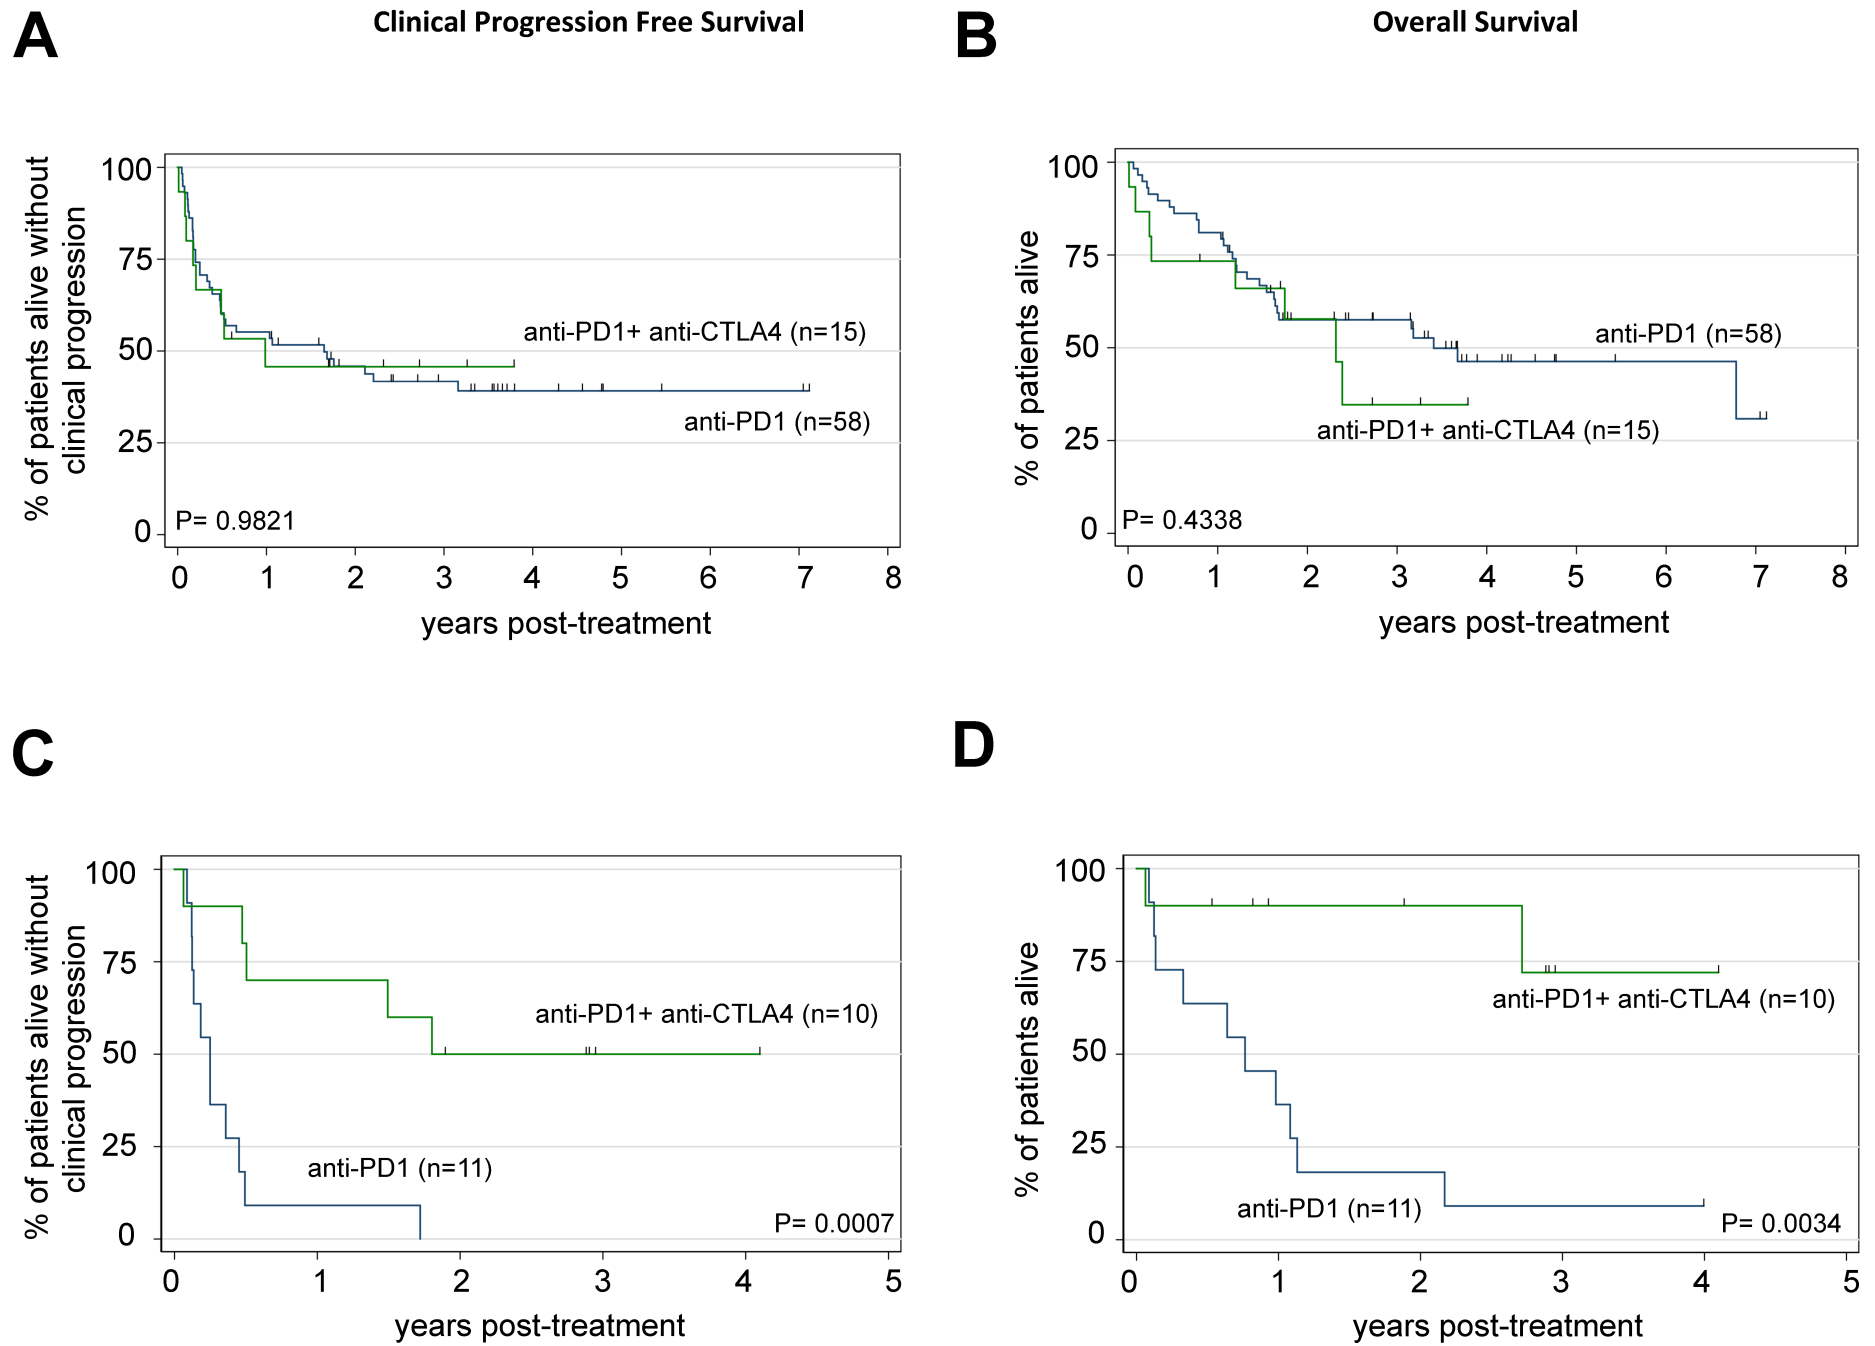

Figure S2

**A**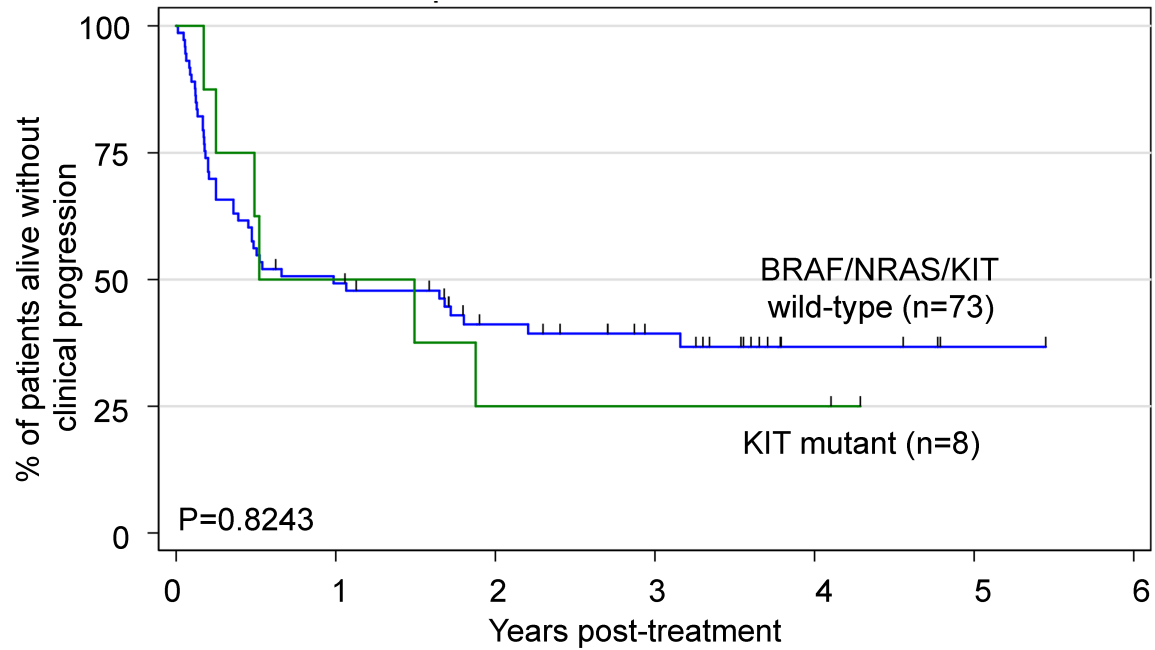**B**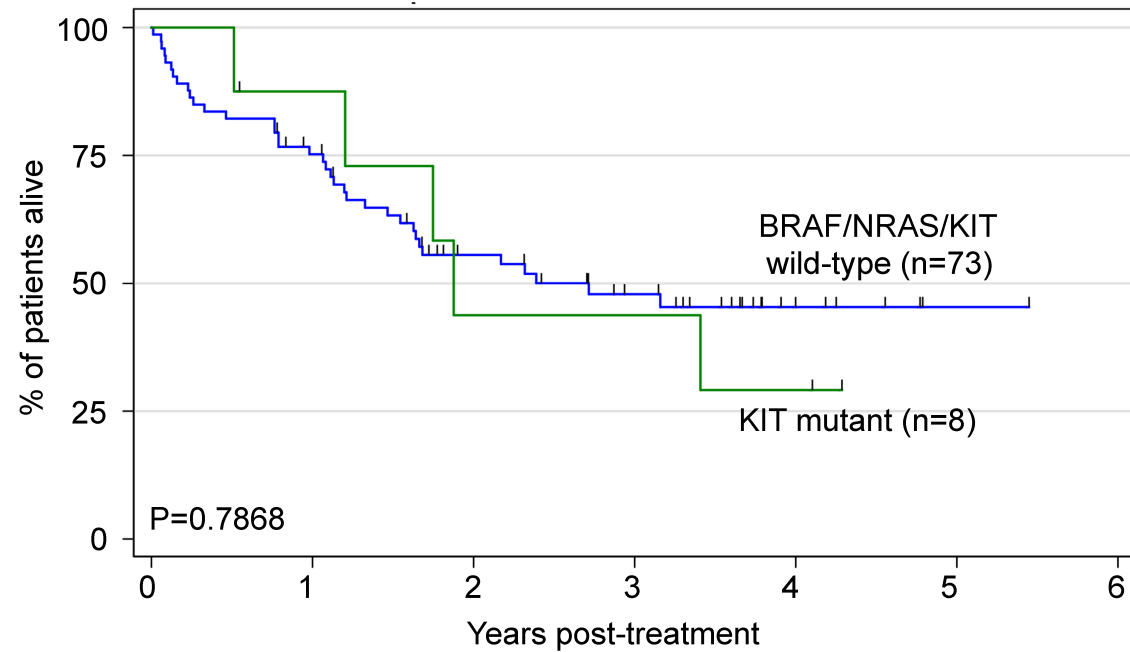

Figure S3
